# Supplementary material for: Circulating Tumor DNA as a Novel Biomarker Optimizing Chemotherapy for Colorectal Cancer
Source: Cancers (Basel). 2020 Jun 13;12(6):1566. doi: 10.3390/cancers12061566 (PMC7352651; doi:10.3390/cancers12061566)
Supplement: Supplementary file 1 [file cancers-12-01566-s001.xlsx]

## Sheet: Table S1
Table S1. The comparison of ctDNA versus tissue biopsy testing.
ctDNA assay		Tissue assay
Quick		Time-intensive procedure
Minimally invasive		Invasive
Serial testing: easy		Serial testing: not easy
Less expensive		Expensive
Comprehensive tissue profile		Localized tissue profile
Low correlation with histology or cellular phenotype		High correlation with histology and cellular phenotype
Limited evidence for treatment selection in advanced cancer		Substantial evidence for treatment selection in multiple malignancies for early and advanced cancers
ctDNA: circulating tumor DNA

## Sheet: Table S2
Table S2. Comparison of technologies used for ctDNA analysis.
Scale of analysis		Technology		LoD
Single-locus or multiplexed assays		Microfluidic or allele specific PCR
		Droplet digital PCR		1e-05
		Allele-specific quantitative PCR		<0.01%
		BEAMing		0.0001
Targeted sequencing approaches		Amplicon Sequencing
		Safe-SeqS		0.001
		TAm-Seq		>2%
		Hybridization caputure
		CAPP-Seq		0.0001
Genome-wide analysis		Whole Exome Sequencing		>1-3%
		Whole Genome Sequencing		5-10%
ctDNA: circulating tumor DNA
PCR: polymerase chain reaction
BEAMing: Beads, Emulsions, Amplification, Magnetics
cfDNA: cell-free DNA
Safe-SeqS: safe-sequencing system
TAm-Seq: tagged-amplicon deep sequencing
CAPP-Seq: cancer personalized profiling by deep sequencing
LoD: limit of detection

## Sheet: Table S3
Table S3. Planned clinical trials to evaluate the utility of circulating tumor DNA for adjuvant chemotherapy in stage II or III colon cancer.
Country	France	Netherland	Germany/Austria/Switzerland	Denmark	United Kingdom	Italy/Spain	Australia	Australia	US/Canada	US/Canada	Japan
Stages of cancer	Stage II	Low risk stage II	Stage II	Stage I / II	High risk stage II or stage III	High risk stage II or stage III	Stage II	Stage III	Stage II	Stage III	Stage II or III
Study name	CIRCULATE (France)	Low MEDOCC	CIRCULATE	IMPROVE-IT	TRACC	PEGASUS	DYNAMIC II	DYNAMIC III	COBRA	CANCERID	CIRCULATE JAPAN
Methodology	Escalate	Randomization based on the resluts of ctDNA testing	Escalate	Escalate	Randomization based on the resluts of ctDNA testing	Assigned based on the resluts of ctDNA testing	Escalate	De-escalate or escalate	Escalate	De-escalate and escalate	De-escalate and escalate
De-escalation to	N/A	N/A	N/A	Observation	Capecitabine or Observation	Capecitabine	N/A	Multiple options depending on pre-specified plans	N/A	5-FU montherapy	Multiple options depending on pre-specified plans
Escalate to	FOLFOX 6 months	Chemotherapy	Capecitabine 6 months or CAPOX 3-6 months	CAPOX or FOLFOX	CAPOX	CAPOX/FOLFIRI	5FU-based regimen or fluoropyrimidine plus oxaliplatin	Multiple options	FOLFOX/CAPOX	FOLFOXIRI 6 months	Multiple options
Sample size	1980	1320	4812	64	1621	140	450	1000	1408	2000	2800
Phase	III	III	III	II	III	II	II	II/III	II/III	III	III
Trial ID	NCT04120701	Plannning	NCT04089631	NCT03748680	Plannning	NCT04259944	ACTRN12615000381583	ACTRN12617001566325	NCT04068103	Plannning	Plannning
N/A: not applicable
FOLFOX: a combination of leucovorin and fluorouracil with oxaliplatin
CAPOX: a combination of capecitabine with oxaliplatin
ctDNA: circulating tumor DNA
FOLFIRI: a combination of leucovorin and fluorouracil with irinotecan
